# Supplementary material
Source: Research Square preprint supplement (doi:10.21203/rs.3.rs-8574898/v1)
Supplement: Supplementary file 1 [file 84e8bfee89abaff293df9773.xlsx]

## Sheet: new genomes
genome_name	CNCM_genome_name	genome_accession	num_read_pairs	num_sequenced_bases	Genome size (bp)	GC content	# contigs	N50 (contigs)	Longest contig (bp)	# predicted genes	Completeness.checkm	Contamination.checkm	Completeness.checkm2	Contamination.checkm2	gdtb_r220_classification
NVB_014	CNCM I-6207	GCA_977072305.1	9943728	2958163936	2653096	63.2	49	113109	326890	2233	100	0.81	99.84	0.31	d__Bacteria;p__Actinomycetota;c__Coriobacteriia;o__Coriobacteriales;f__Eggerthellaceae;g__Adlercreutzia;s__Adlercreutzia sp.
NVB_016	CNCM I-6208	GCA_975656085.1	778812	232635264	2743192	63.1	29	144399	469376	2299	100	0	99.95	0.24	d__Bacteria;p__Actinomycetota;c__Coriobacteriia;o__Coriobacteriales;f__Eggerthellaceae;g__Adlercreutzia;s__Adlercreutzia rubneri
NVB_020	CNCM I-6209	GCA_974388775.1	1158028	343574118	2763124	63.2	23	211526	469354	2313	100	0	99.96	0.51	d__Bacteria;p__Actinomycetota;c__Coriobacteriia;o__Coriobacteriales;f__Eggerthellaceae;g__Adlercreutzia;s__Adlercreutzia rubneri
NVB_022	CNCM I-6210	GCA_974388795.1	3309926	985116680	2776862	63.3	42	108696	249871	2330	100	0	99.86	0.49	d__Bacteria;p__Actinomycetota;c__Coriobacteriia;o__Coriobacteriales;f__Eggerthellaceae;g__Adlercreutzia;s__Adlercreutzia rubneri
NVB_025	CNCM I-6211	GCA_974209945.1	9272090	2762158466	2691048	63.3	41	119043	327547	2278	100	0	99.76	0.15	d__Bacteria;p__Actinomycetota;c__Coriobacteriia;o__Coriobacteriales;f__Eggerthellaceae;g__Adlercreutzia;s__Adlercreutzia rubneri
NVB_026	CNCM I-6212	GCA_975765305.1	950948	283812491	2611770	63.5	38	117410	413502	2191	100	0	99.98	0.46	d__Bacteria;p__Actinomycetota;c__Coriobacteriia;o__Coriobacteriales;f__Eggerthellaceae;g__Adlercreutzia;s__Adlercreutzia rubneri
NVB_031	CNCM I-6213	GCA_974382915.1	5816332	1728994439	2775163	63.2	31	222517	419128	2319	100	0	99.61	0.66	d__Bacteria;p__Actinomycetota;c__Coriobacteriia;o__Coriobacteriales;f__Eggerthellaceae;g__Adlercreutzia;s__Adlercreutzia rubneri
NVB_037	CNCM I-6214	GCA_975765435.1	7779359	2316207441	2754125	63.2	14	417570	692420	2305	100	0	99.88	0.68	d__Bacteria;p__Actinomycetota;c__Coriobacteriia;o__Coriobacteriales;f__Eggerthellaceae;g__Adlercreutzia;s__Adlercreutzia rubneri
NVB_040	CNCM I-6215	GCA_977072315.1	3003676	893246665	2850030	63.1	38	164707	424559	2405	100	0.81	99.98	1.14	d__Bacteria;p__Actinomycetota;c__Coriobacteriia;o__Coriobacteriales;f__Eggerthellaceae;g__Adlercreutzia;s__Adlercreutzia sp.
NVB_043	CNCM I-6216	GCA_977113345.1	6298295	1878472383	2791400	63.3	33	220891	428609	2369	100	0	99.98	0.49	d__Bacteria;p__Actinomycetota;c__Coriobacteriia;o__Coriobacteriales;f__Eggerthellaceae;g__Adlercreutzia;s__Adlercreutzia sp.
NVB_044	CNCM I-6217	GCA_975705685.1	677120	201864023	2801629	63.2	40	199343	386475	2363	100	0	99.86	0.82	d__Bacteria;p__Actinomycetota;c__Coriobacteriia;o__Coriobacteriales;f__Eggerthellaceae;g__Adlercreutzia;s__Adlercreutzia rubneri

## Sheet: public genomes
genome_name	genome_alias	type_strain	Genome size (bp)	GC content	# contigs	N50 (contigs)	Longest contig (bp)	# predicted genes	Completeness.checkm	Contamination.checkm	Completeness.checkm2	Contamination.checkm2	gdtb_r220_classification
GCF_000478885.1	A. equolifaciens DSM 19450	TRUE	2862526	63.5	1	2862526	2862526	2278	100	0.81	100	1	d__Bacteria;p__Actinomycetota;c__Coriobacteriia;o__Coriobacteriales;f__Eggerthellaceae;g__Adlercreutzia;s__Adlercreutzia equolifaciens
GCF_003726015.1	A. equolifaciens subsp. celata DSM 18785	TRUE	2883531	63.1	47	134918	260955	2390	100	0.2	99.97	0.43	d__Bacteria;p__Actinomycetota;c__Coriobacteriia;o__Coriobacteriales;f__Eggerthellaceae;g__Adlercreutzia;s__Adlercreutzia equolifaciens
GCF_009755265.1	A. rubneri ResAG-91	TRUE	2783074	63.3	49	107842	364018	2338	100	0	99.94	0.51	d__Bacteria;p__Actinomycetota;c__Coriobacteriia;o__Coriobacteriales;f__Eggerthellaceae;g__Adlercreutzia;s__Adlercreutzia rubneri
GCF_011405655.1	A. hattorii 8CFCBH1	TRUE	2908404	63	1	2908404	2908404	2423	100	1.08	99.96	0.98	d__Bacteria;p__Actinomycetota;c__Coriobacteriia;o__Coriobacteriales;f__Eggerthellaceae;g__Adlercreutzia;s__Adlercreutzia rubneri
GCA_040096635.1	A. equolifaciens CLA-AA-H180	FALSE	2681497	63.3	87	68918	178998	2237	100	0.81	99.98	0.14	d__Bacteria;p__Actinomycetota;c__Coriobacteriia;o__Coriobacteriales;f__Eggerthellaceae;g__Adlercreutzia;s__Adlercreutzia rubneri
GCF_003340325.1	A. equolifaciens subsp. celata OB21 GAM 11	FALSE	2669552	63.1	54	75477	288544	2268	100	0.2	99.94	0.14	d__Bacteria;p__Actinomycetota;c__Coriobacteriia;o__Coriobacteriales;f__Eggerthellaceae;g__Adlercreutzia;s__Adlercreutzia rubneri
GCF_009874275.1	A. equolifaciens IPLA 37004	FALSE	2627793	63.6	56	101827	325998	2244	100	0	99.92	0.06	d__Bacteria;p__Actinomycetota;c__Coriobacteriia;o__Coriobacteriales;f__Eggerthellaceae;g__Adlercreutzia;s__Adlercreutzia equolifaciens
GCF_019972915.1	A. equolifaciens 9CBH6	FALSE	2858962	63.3	42	158258	310020	2459	100	0.81	99.98	1.56	d__Bacteria;p__Actinomycetota;c__Coriobacteriia;o__Coriobacteriales;f__Eggerthellaceae;g__Adlercreutzia;s__Adlercreutzia equolifaciens
GCF_022136775.1	A. equolifaciens DFI.4.34	FALSE	2639846	63.4	59	93303	248727	2220	100	0	99.37	0.35	d__Bacteria;p__Actinomycetota;c__Coriobacteriia;o__Coriobacteriales;f__Eggerthellaceae;g__Adlercreutzia;s__Adlercreutzia equolifaciens
GCF_027677145.1	A. equolifaciens TM12-20A	FALSE	2767514	63.2	42	93417	325503	2246	100	1.28	99.97	1.32	d__Bacteria;p__Actinomycetota;c__Coriobacteriia;o__Coriobacteriales;f__Eggerthellaceae;g__Adlercreutzia;s__Adlercreutzia equolifaciens
GCF_029076465.1	A. rubneri DFI.6.8	FALSE	2766809	63.4	24	258984	585905	2366	100	0.81	99.99	0.29	d__Bacteria;p__Actinomycetota;c__Coriobacteriia;o__Coriobacteriales;f__Eggerthellaceae;g__Adlercreutzia;s__Adlercreutzia rubneri
GCF_040093715.1	A. equolifaciens CLA-AA-H266	FALSE	2726105	63	57	97379	242342	2278	100	0	99.91	0.31	d__Bacteria;p__Actinomycetota;c__Coriobacteriia;o__Coriobacteriales;f__Eggerthellaceae;g__Adlercreutzia;s__Adlercreutzia equolifaciens
SRS254664	A. equolifaciens UC1_BHI_P	FALSE	2667775	63.3	68	86137	179503	2224	100	0.81	99.99	0.22	d__Bacteria;p__Actinomycetota;c__Coriobacteriia;o__Coriobacteriales;f__Eggerthellaceae;g__Adlercreutzia;s__Adlercreutzia rubneri
