# Supplementary material
Source: Research Square preprint supplement (doi:10.21203/rs.3.rs-8574898/v1)
Supplement: Supplementary file 2 [file be3dbcc414e0b40c911c63ab.docx]

**Comparative genomics and functional characterization of 11 newly isolated non-equol-producing Adlercreutzia strains with anti-inflammatory properties**

Chamignon et al

**Supplementary figures**


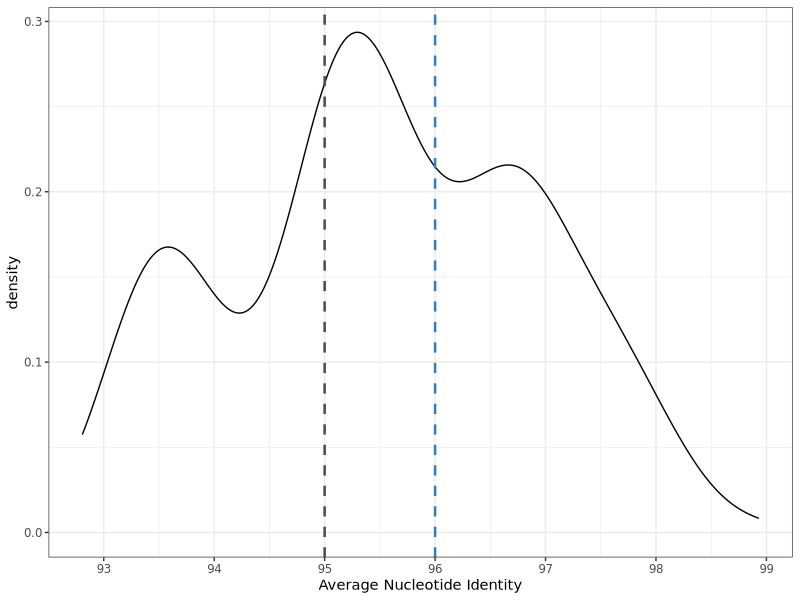


**Figure S1: Distribution of pairwise Average Nucleotide Identity (ANI) among the 24 analysed genomes.** The density plot highlights that the conventional 95% species boundary (black dashed line) falls within a high-density peak rather than a distinct gap. The blue dashed line indicates the 96% ANI cutoff, which aligns with a local minimum in the distribution and was used to more accurately delineate genome clusters.


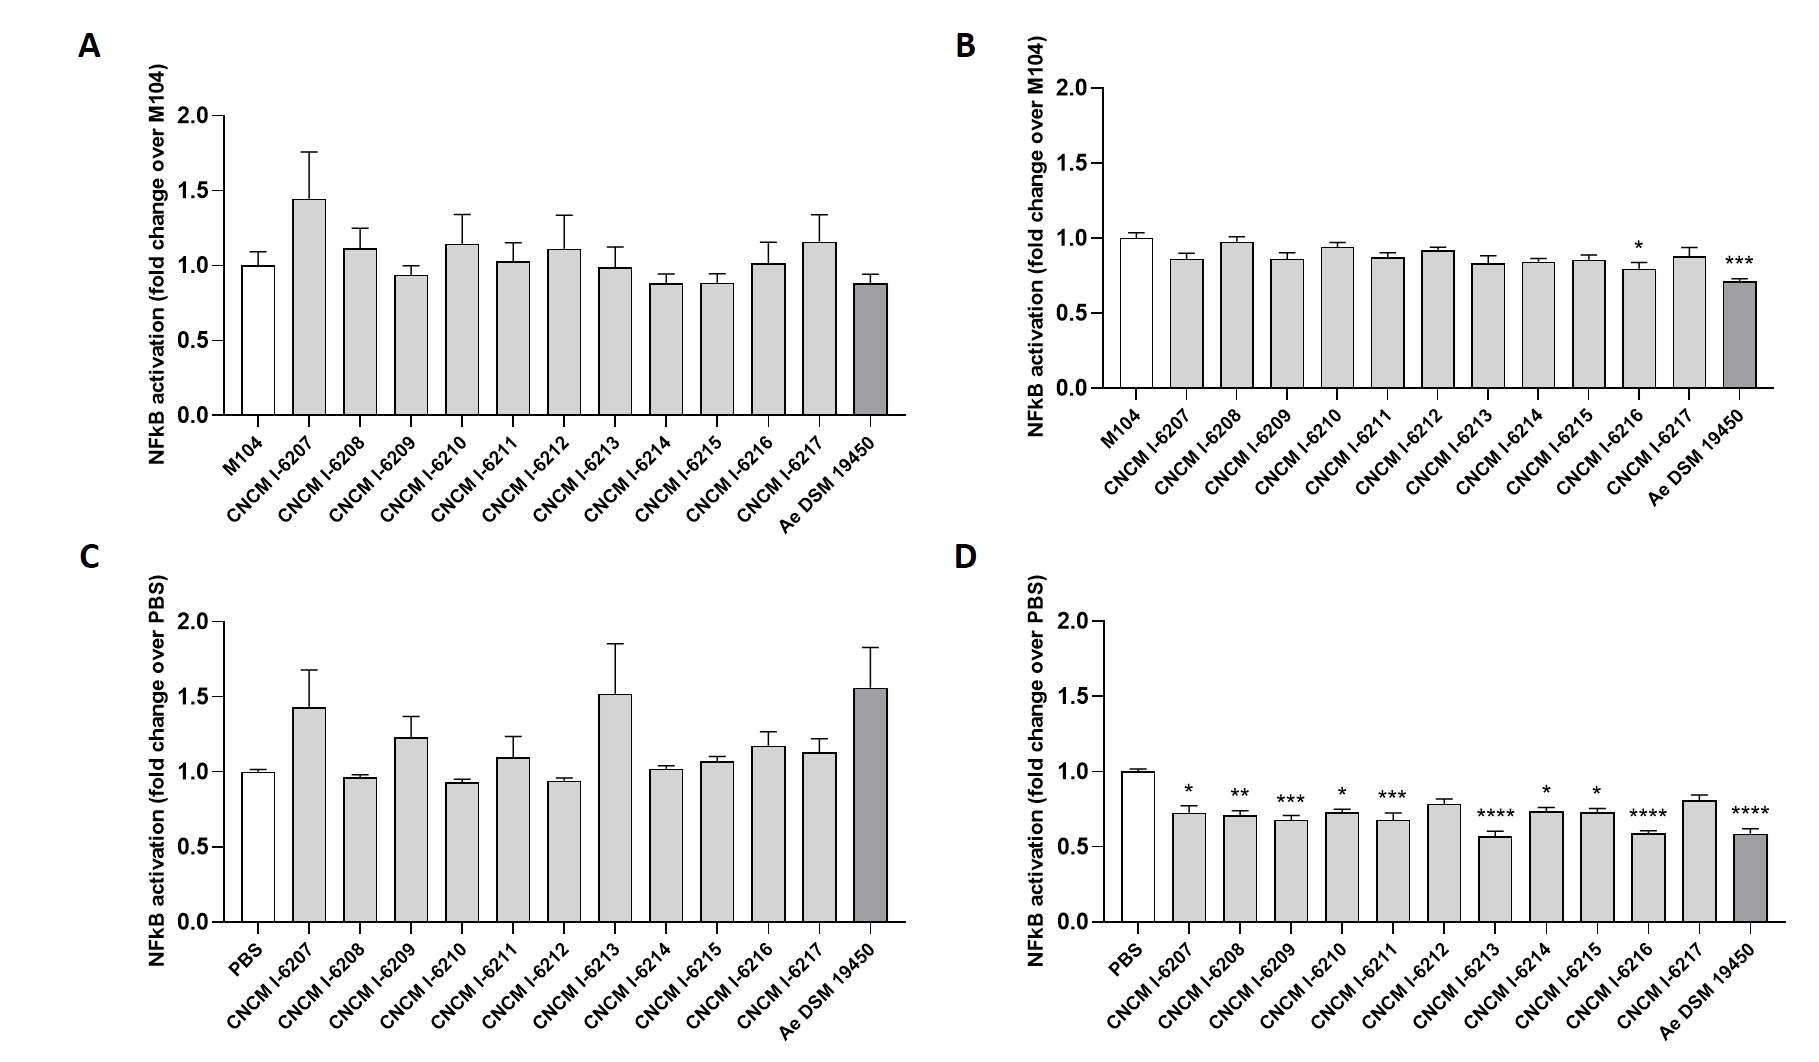


**Figure S2**: **Effect of supernatant (_SN) (A and B) and pellet (_P) (C and D) of the newly isolated strains and *A. equolifaciens* DSM 19450 on NF-κB activity of HT-29 NF-κB cell line.**

Activities were measured in non-inflammatory (A and C) or inflammatory (_TNF) (B and D) conditions repeated three times independently with triplicate determinations. Values are expressed as fold increase over group controls (M104 or PBS). Statistical significance was assessed with a Kruskal–Wallis test followed by Dunn’s multiple‑comparison post‑hoc test. * *p* < 0.05, ** *p* < 0.01, *** *p* < 0.001, **** *p* < 0.0001.


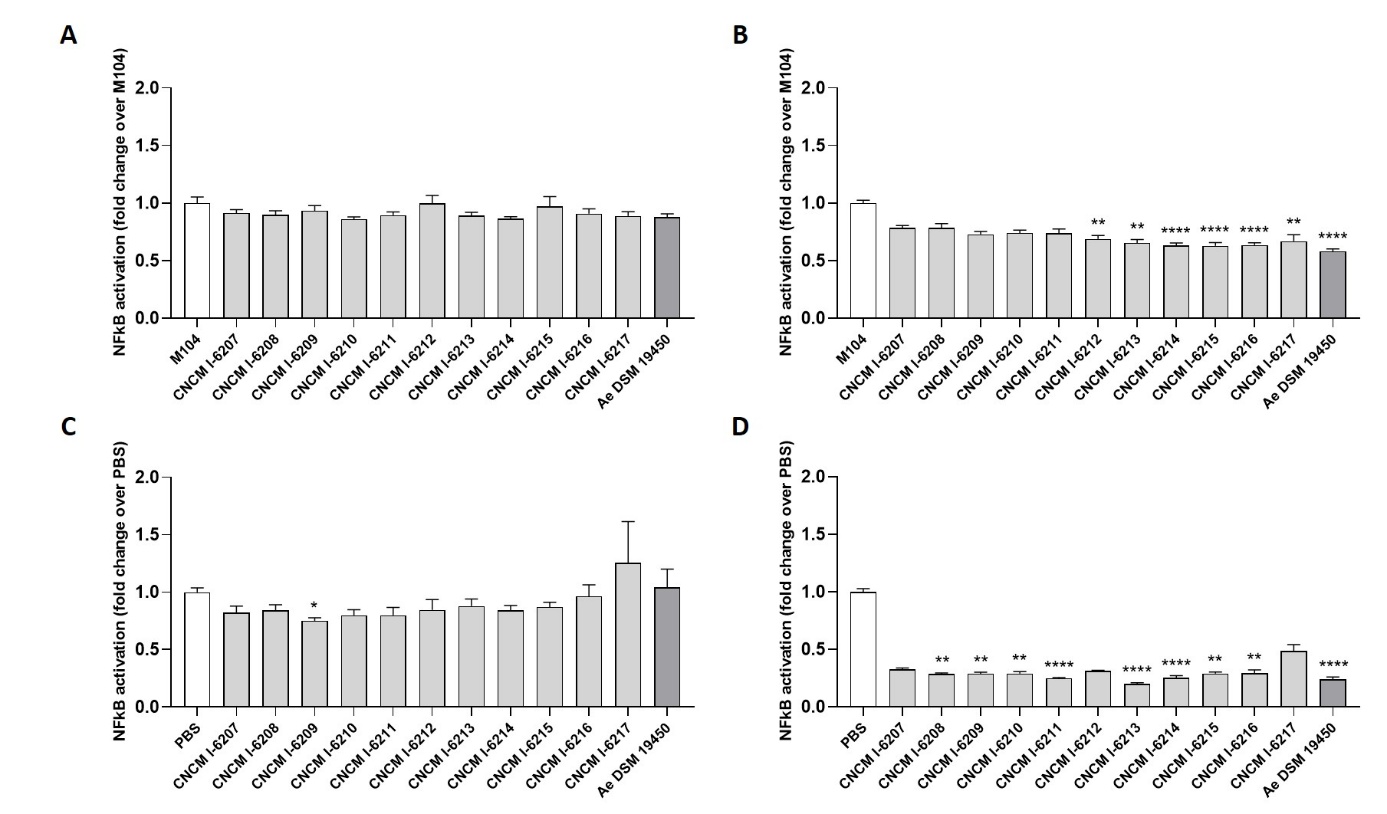


**Figure S3**: **Effect of supernatant (_SN) (A and B) and pellet (_P) (C and D) of the newly isolated strains and *A. equolifaciens* DSM 19450 on NF-κB activity of HepG2 NF-κB cell line.**

Activities were measured in non-inflammatory (A and C) or inflammatory (_TNF) (B and D) conditions repeated three times independently with triplicate determinations. Values are expressed as fold increase over group controls (M104 or PBS). Statistical significance was assessed with a Kruskal–Wallis test followed by Dunn’s multiple‑comparison post‑hoc test. * *p* < 0.05, ** *p* < 0.01, **** *p* < 0.0001.


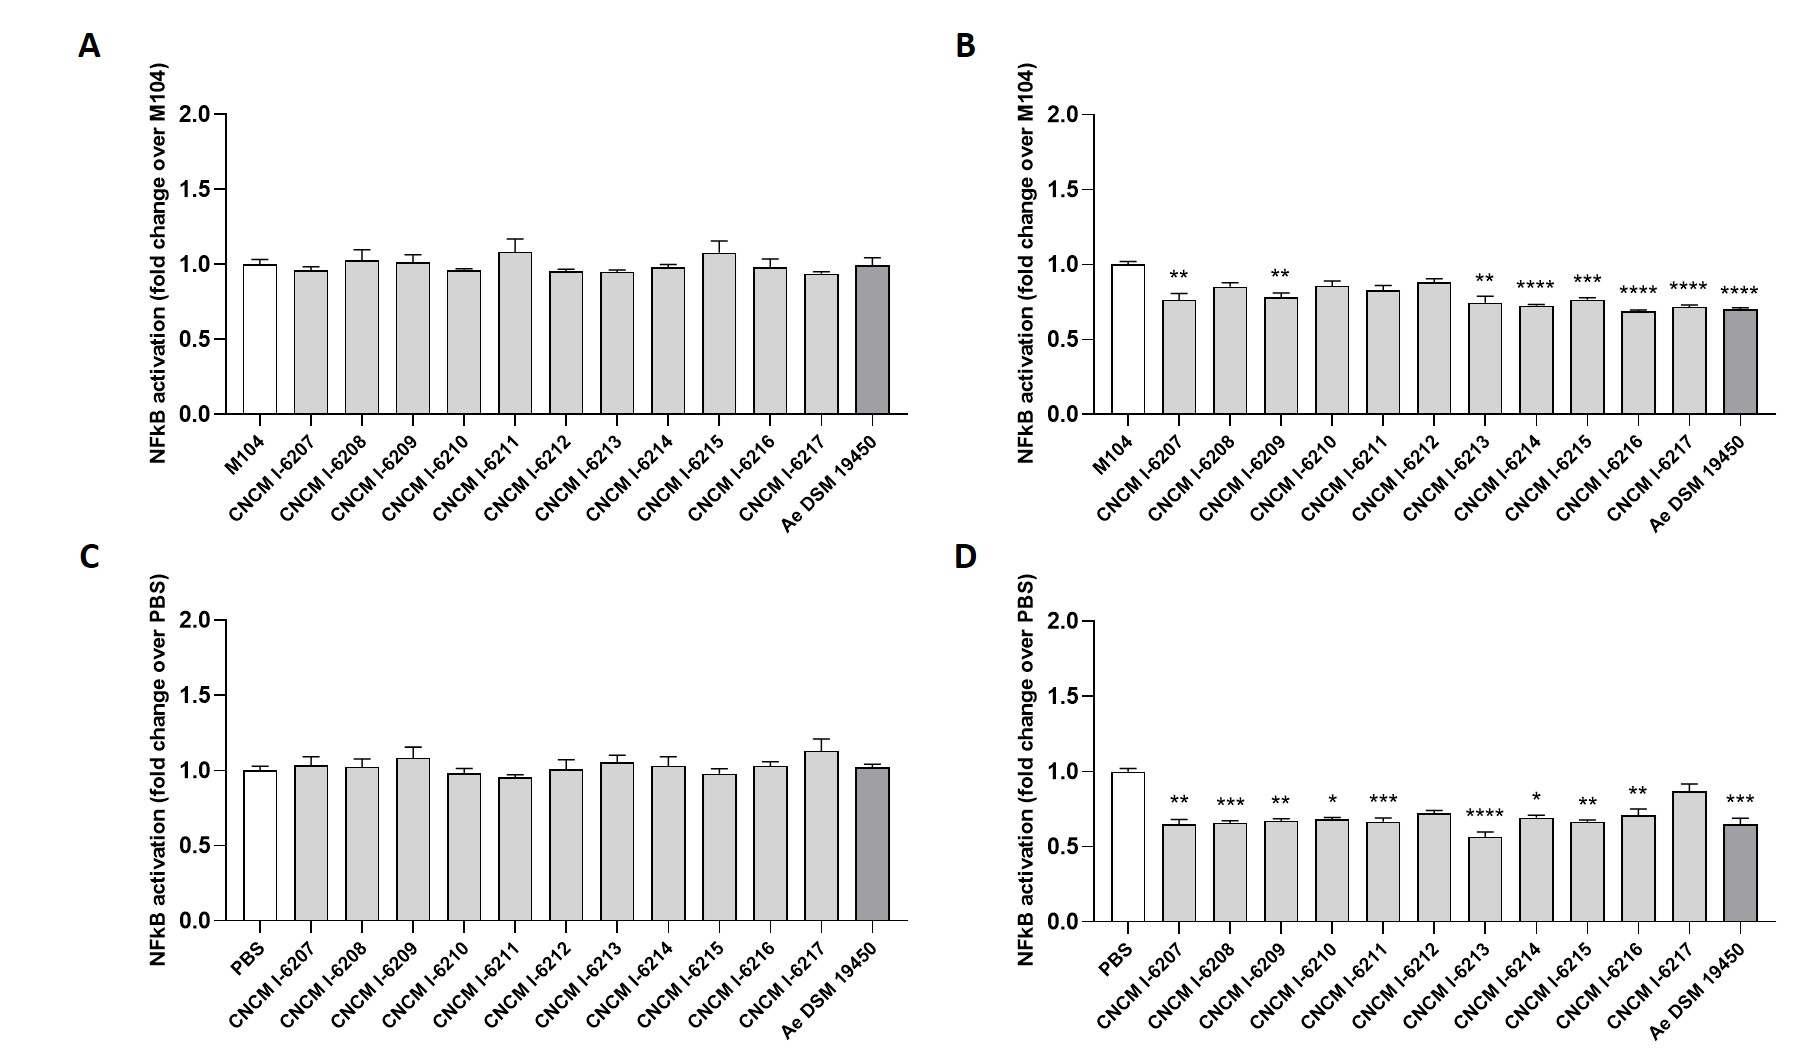


**Figure S4: Effect of supernatant (_SN) (A and B) and pellet (_P) (C and D) of the newly isolated strains and *A. equolifaciens* DSM 19450 on NF-κB activity of HEK Null1 cell line.**

Activities were measured in non-inflammatory (A and C) or inflammatory (_TNF) (B and D) conditions repeated three times independently with triplicate determinations. Values are expressed as fold increase over group controls (M104 or PBS). Statistical analysis consisted of Kruskall-Wallis followed by Dunn’s multiple comparison test. * *p* < 0.05, ** *p* < 0.01, *** *p* < 0.001, **** *p* < 0.0001.


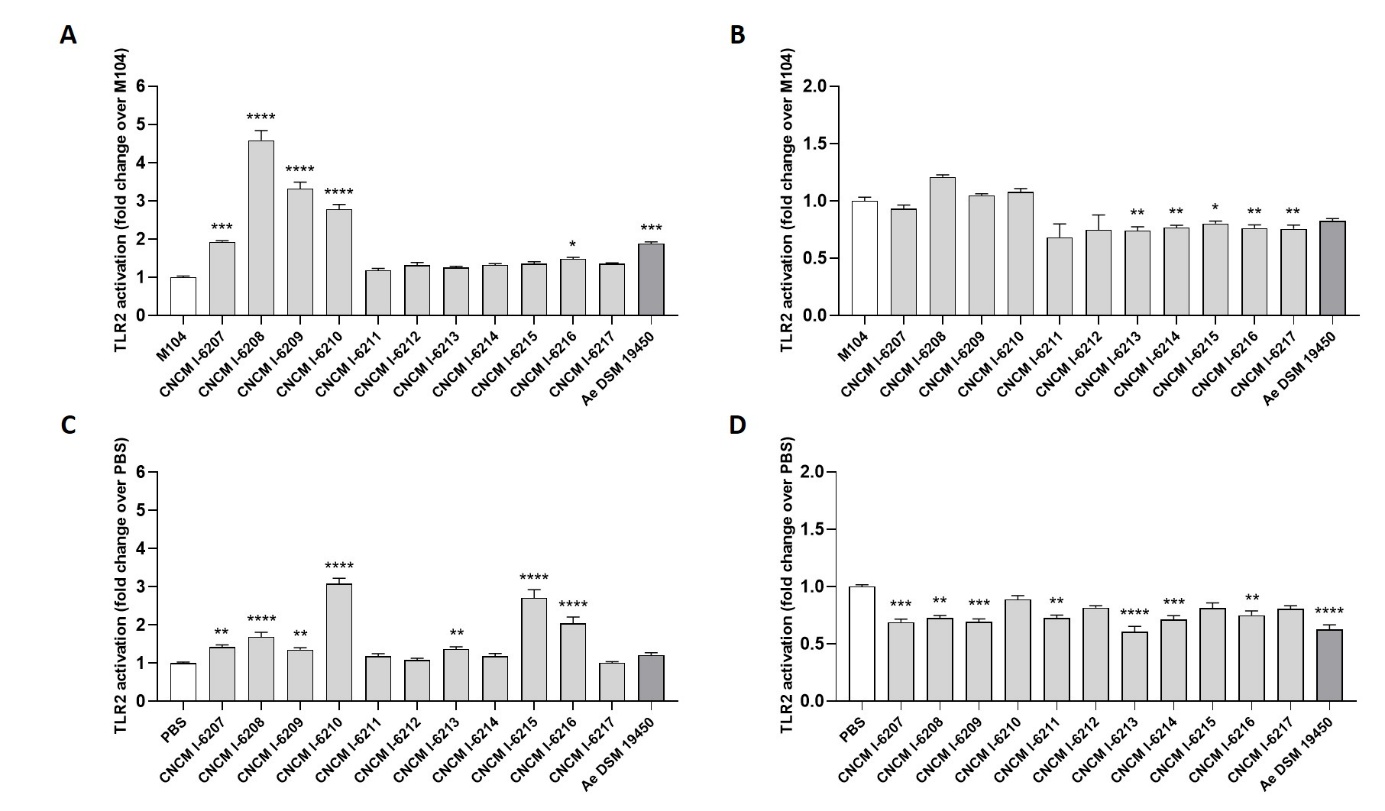


**Figure S5: Effect of supernatant (_SN) (A and B) and pellet (_P) (C and D) of the newly isolated strains and *A. equolifaciens* DSM 19450 on NF-κB activity of HEK TLR2 cell line.**

Activities were measured in non-inflammatory (A and C) or inflammatory (_TNF) (B and D) conditions repeated three times independently with triplicate determinations. Values are expressed as fold increase over group controls (M104 or PBS). Statistical analysis consisted of Kruskall-Wallis followed by Dunn’s multiple comparison test. * *p* < 0.05, ** *p* < 0.01, *** *p* < 0.001, **** *p* < 0.0001.

# Supplementary information

**Supplementary Table 1**: Genome assembly quality and metadata of newly isolated Adlercreutzia strains and publicly available GenBank genomes.
